# Supplementary material for: Cu2(BDC)2(BPY)–MOF: an efficient and reusable heterogeneous catalyst for the aerobic Chan–Lam coupling prepared via ball-milling strategy
Source: Royal Society of Chemistry journal article supplement (doi:10.1039/c7ra09772g), 2017-01-01
Supplement: c7ra09772g1.pdf [file c7ra09772g1.pdf]

## Supporting Information

### **Cu<sub>2</sub>(BDC)<sub>2</sub>(BPY)-MOF: An Efficient and Reusable Heterogeneous Catalyst For The Aerobic Chan–Lam Coupling Prepared via Ball-milling Strategy**

Armağan Khosravi <sup>a</sup>, Javad Mokhtari\*<sup>a</sup>, Mohammad Reza Naimi-Jamal\*<sup>b</sup>, Sharareh Tahmasebi, Leila Panahi<sup>b</sup>

<sup>a</sup> Department of Chemistry, Science and Research Branch, Islamic Azad University, P.O. Box 14515/775, Tehran, Iran. Corresponding author e-mail address: j.mokhtari@srbiau.ac.ir

<sup>b</sup> Department of Chemistry, Research Laboratory of Green Organic Synthesis & Polymers, Iran University of Science and Technology, P.O. Box 16846-13114 Tehran, Iran. Corresponding author e-mail address: Naimi@iust.ac.ir

## Materials and instruments

All reagents and starting materials including organic linker H<sub>2</sub>BDC, metal salt Cu(OAc)<sub>2</sub>·H<sub>2</sub>O, 1,4-benzenedicarboxylate (BDC, 99%), 4,4'-bipyridine (BPY) were obtained from commercially available sources such as Sigma-Aldrich and Merck and used without any further purification. X-ray powder diffraction (XRD) patterns recorded using an X'pert MPD. The sample was characterized using a scanning electron microscope (SEM) with a ZEISS scanning electron microscope at 30 kV with gold coating. FT-IR spectra were recorded with a Shimadzu 8400s FT-IR spectrometer using potassium bromide pellets. Brunauer-Emmett-Teller (BET) surface area of the samples was determined from N<sub>2</sub> adsorption-desorption isotherms using a Quantachrome NovaWin2 analyzer. Transmission electron microscopy (TEM) was carried out using an EM10C-100 kV series microscope from the ZEISS Company, German and the actual loading of copper was determined by Inductively Coupled Plasma (ICP) analysis on sequential plasma spectrometer, Shimadzu (ICPS-7000 ver. 2).

### Ball-milling Synthesis of the metal-organic framework Cu<sub>2</sub>(BDC)<sub>2</sub>(BPY)

A mixture of Cu(OAc)<sub>2</sub>·H<sub>2</sub>O (0.6 mmol), H<sub>2</sub>BDC (0.6 mmol) and BPY (0.3 mmol) with molar ratio of 1:1:0.5 were ball-milled vigorously at 30Hz without any solvent at room temperature for 2 h. The obtained green powder was washed with DMF (2\*10 mL). Solvent exchange was carried out with methanol (2\*10 mL) at room temperature. To remove the guest molecules of MOFs, obtained powder was treated by heating under vacuum at 130 °C for 12 h. The resulting green powder was isolated with 96% yield and characterized by several techniques including PXRD, SEM, TEM, BET, CHN, ICP and FT-IR.

### General procedure for the N-Arylation of Aromatic amines

To a mixture of Cu<sub>2</sub>(BDC)<sub>2</sub>BPY (20 mg) and aromatic amine (1 mmol) in H<sub>2</sub>O/MeOH (4 mL, 1:1), phenylboronic acid (2 mmol) was added and the resultant mixture was stirred at room temperature for 1 h. After completion of the reaction (monitored by TLC) catalyst was filtered and washed by H<sub>2</sub>O/methanol (2 ml, 1:1). Then, the filtrate was diluted with water (10 mL),

extracted with ethyl acetate (2×10 ml), and the combined extracts were dried with Na<sub>2</sub>SO<sub>4</sub>. The product was purified by column chromatography (silica gel, n-hexane/EtOAc) to afford diarylamines 3a–h. structure of all product was characterized by melting point and <sup>1</sup>H-NMR spectra.

**Diphenylamine (3a):**

White solid, mp 51-52 °C; yield: 78 %; <sup>1</sup>H NMR (500 MHz, CDCl<sub>3</sub>) δ = 7.25-7.28 (m, 4H, CH of Ar), 7.05-7.07 (m, 4H, CH of Ar), 6.92-6.94 (m, 2H, CH of Ar), 5.65 (s, 1H, NH).

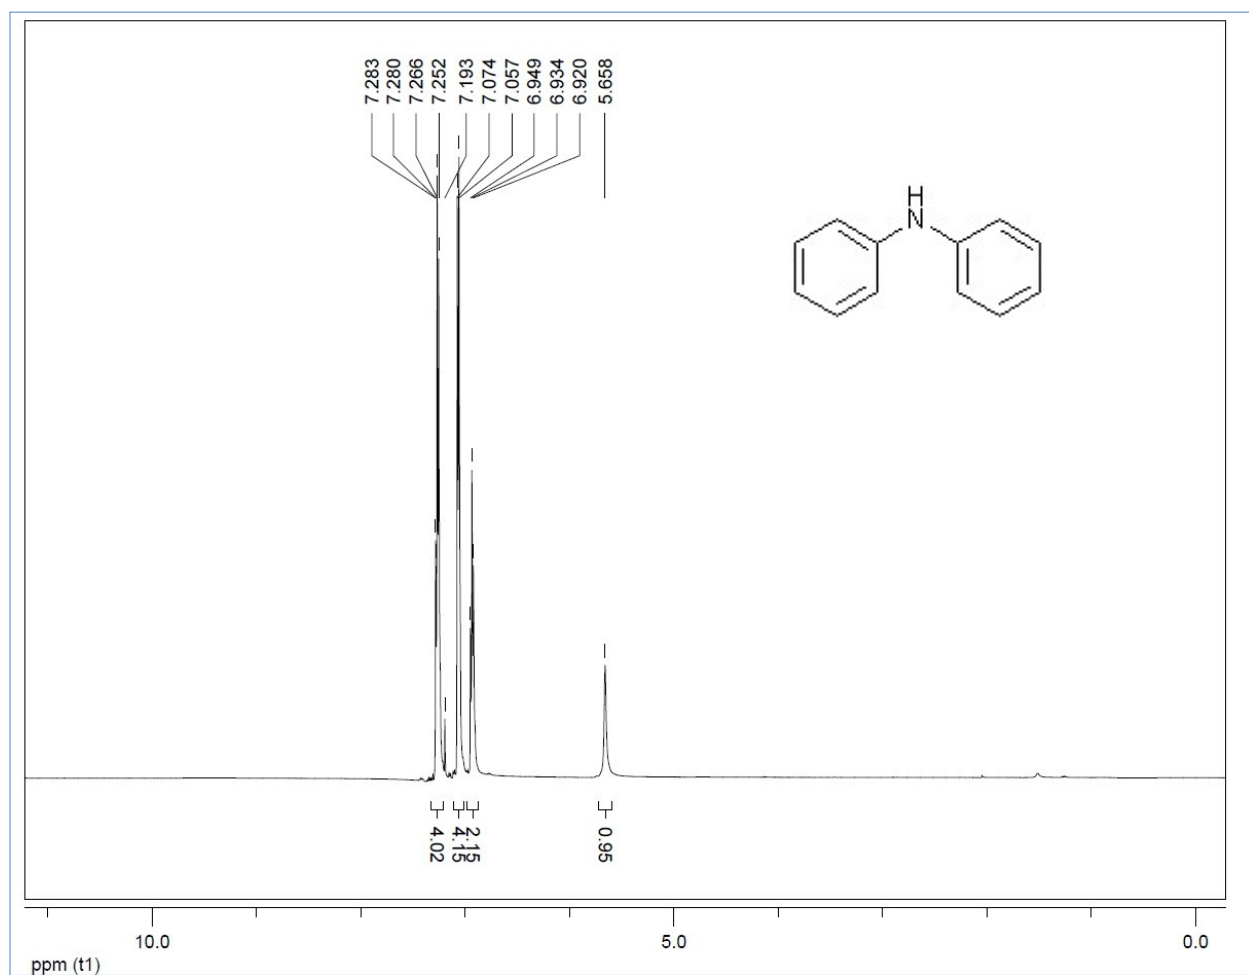

**Fig S1.** <sup>1</sup>H-NMR of diphenylamine

#### 4-Methyl-*N*-Phenylaniline (3b):

White solid; mp 86-89 °C; yield: 80 %;  $^1\text{H NMR}$  (500 MHz,  $\text{CDCl}_3$ )  $\delta = 7.51$  (t,  $J = 9.8$  Hz, 2H, CH of Ar), 7.26-7.34 (m, 6H, CH of Ar), 7.12-7.17 (m, 1H, CH of Ar), 5.85 (s, 1H, NH), 2.57 (s, 3H,  $\text{CH}_3$ ).

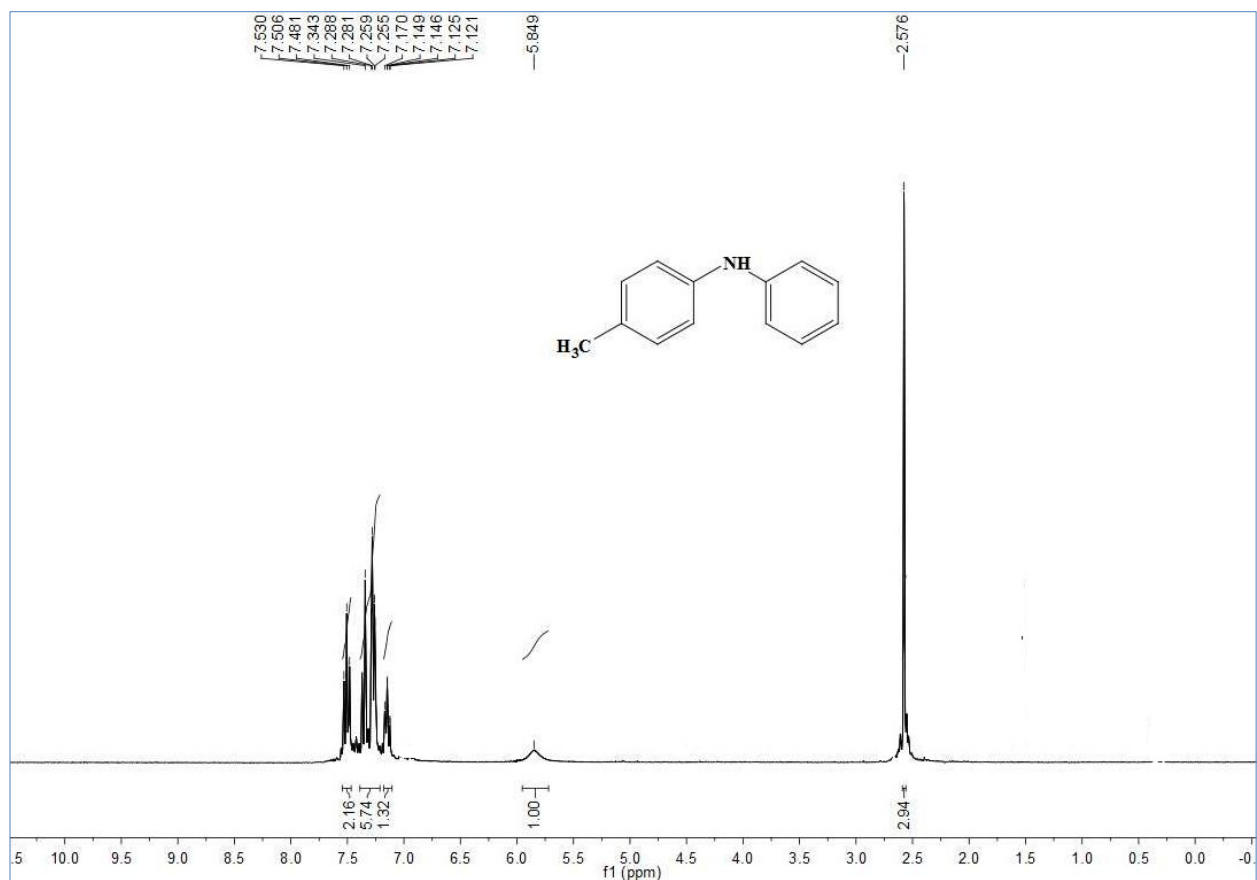

Fig S2.  $^1\text{H-NMR}$  of 4-Methyl-*N*-phenylaniline

### 4-Nitro-*N*-Phenylaniline (3c):

Brown powder; mp 130-133 °C; yield: 81 %;  $^1\text{H NMR}$  (500 MHz,  $\text{CDCl}_3$ )  $\delta = 7.63$ - $7.69$  (m, 2H, CH of Ar),  $7.53$ - $7.58$  (m, 1H, CH of Ar),  $7.45$ - $7.48$  (m, 2H, CH of Ar),  $7.28$ - $7.35$  (m, 3H, CH of Ar),  $7.16$  (d,  $J = 10$  Hz, 1H, CH of Ar),  $6.04$  (s, 1H, NH).

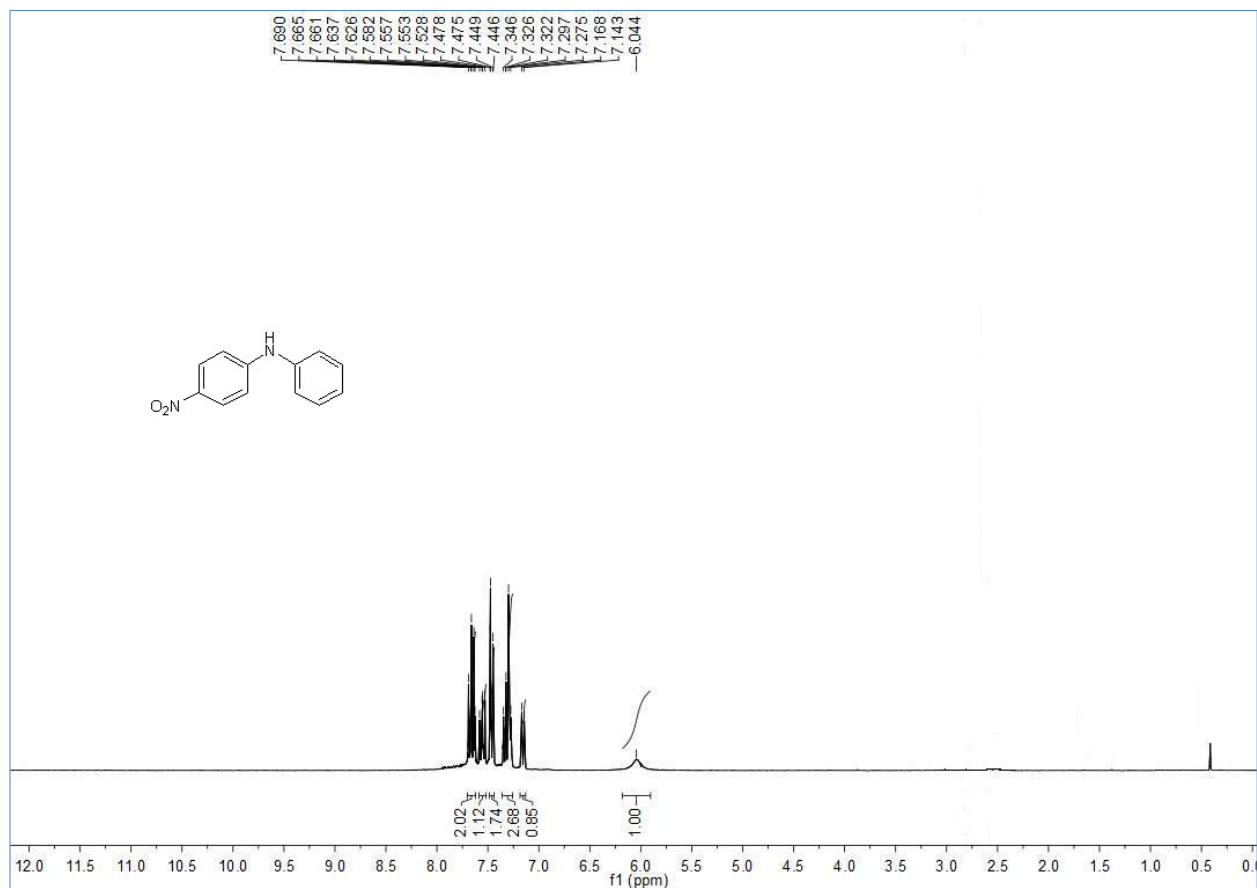

Fig S3.  $^1\text{H-NMR}$  of 4-nitro-*N*-phenylaniline

**4-Bromo-*N*-Phenylaniline (3d):**

Pale yellow; mp 85-89 °C, yield: 75 %; <sup>1</sup>H NMR (500 MHz, CDCl<sub>3</sub>) δ = 7.26-7.28 (m, 2H, CH of Ar), 7.21-7.22 (m, 2H, CH of Ar), 6.98-6.99 (m, 2H, CH of Ar), 6.89-6.91 (m, 1H, CH of Ar), 6.86-6.88 (m, 2H, CH of Ar), 5.61 (s, 1H, NH).

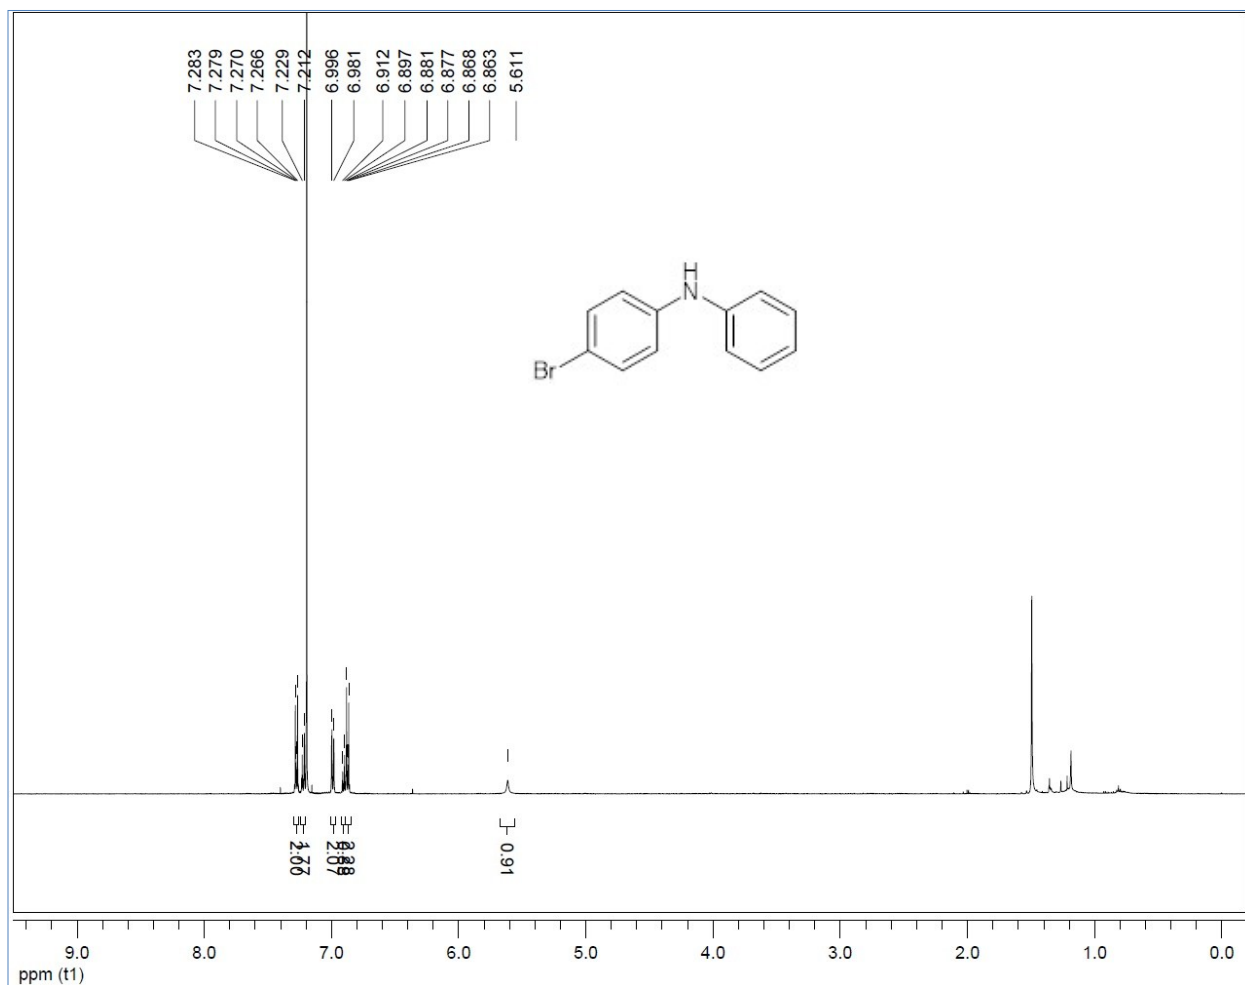

**Fig S4.** <sup>1</sup>H-NMR of 4-bromo-*N*-phenylaniline

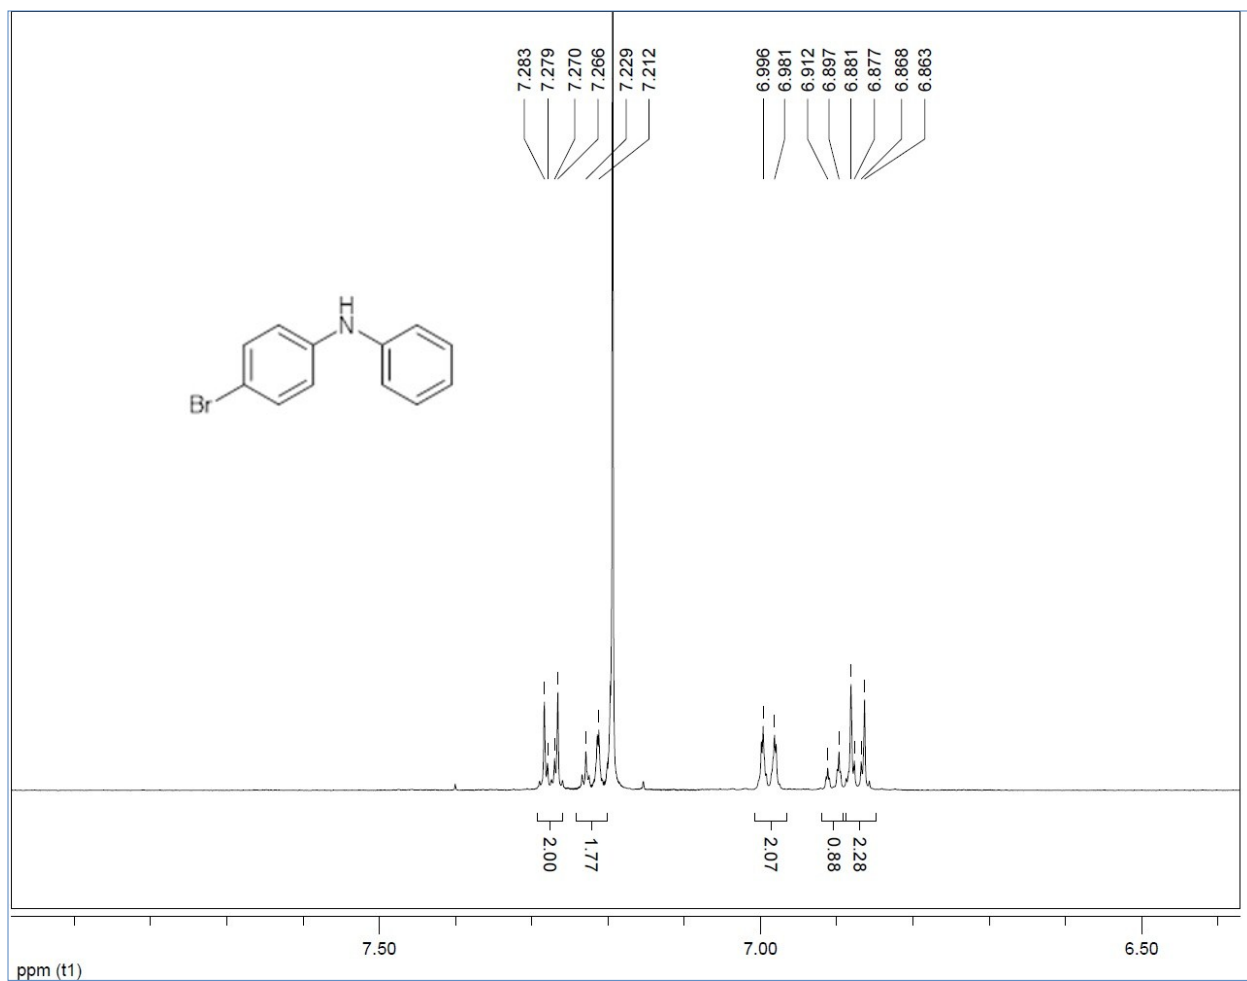

**Fig S5.** Expanded <sup>1</sup>H-NMR spectrum of 4-bromo-N-phenylaniline



**4-Chloro-*N*-Phenylaniline (3e):**

Yellow oil; yield: 79 %;  $^1\text{H NMR}$  (500 MHz,  $\text{CDCl}_3$ )  $\delta$  = 7.24-7.22 (m, 2H, CH of Ar), 7.03-6.95 (m, 6H, CH of Ar), 6.91-6.87 (m, 1H, CH of Ar), 5.56 (s, 1H, NH)

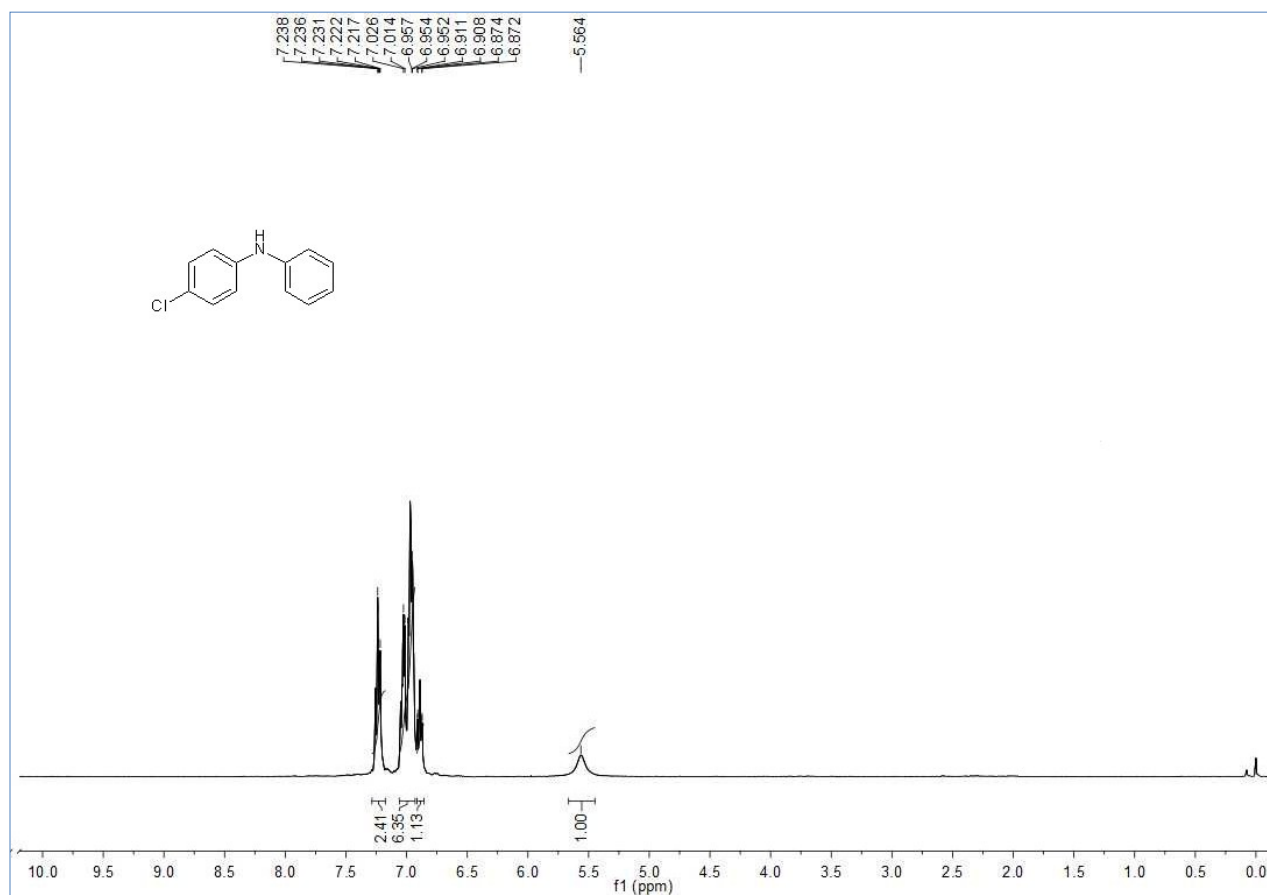

**Fig S6.**  $^1\text{H-NMR}$  of 4-chloro-*N*-phenylaniline

**N-phenylpyrimidin-2-amine (3f):**

White solid, mp 113-115 °C; yield: 82 %;  $^1\text{H NMR}$  (500 MHz,  $\text{CDCl}_3$ )  $\delta$  = 8.35 (d, 2H,  $J$  = 5Hz, CH of Ar), 7.54 (d,  $J$  = 7.5 Hz, 2H, CH of Ar), 7.26-7.29 (m, 2H, CH of Ar), 7.03 (s, 1H, NH), 6.97-7.00 (m, 1H, CH of Ar), 6.64-6.66 (t,  $J$  = 9.5 Hz, 1H, CH of Ar).

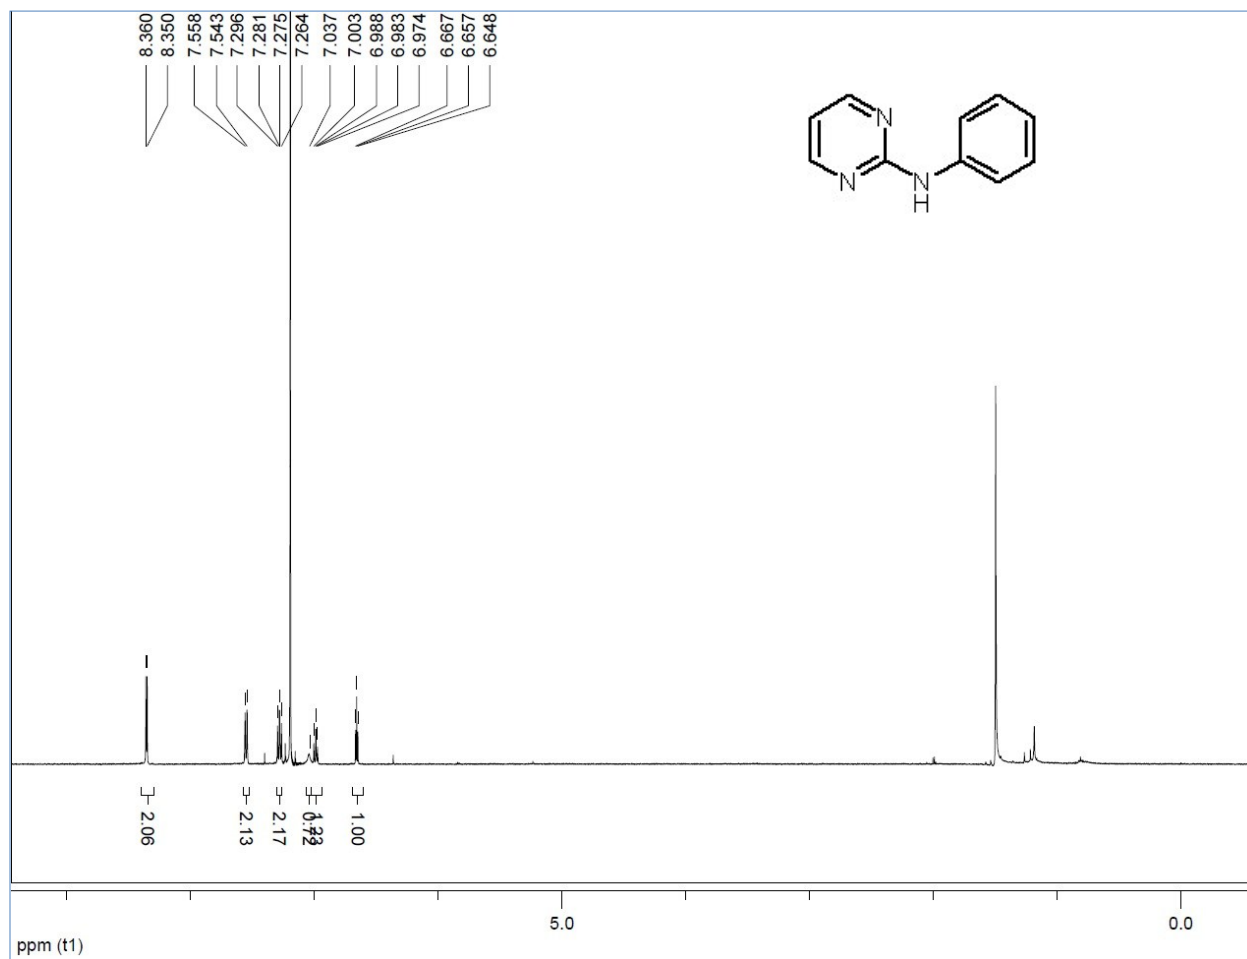

**Fig S7.**  $^1\text{H-NMR}$  of N-phenylpyrimidin-2-amine

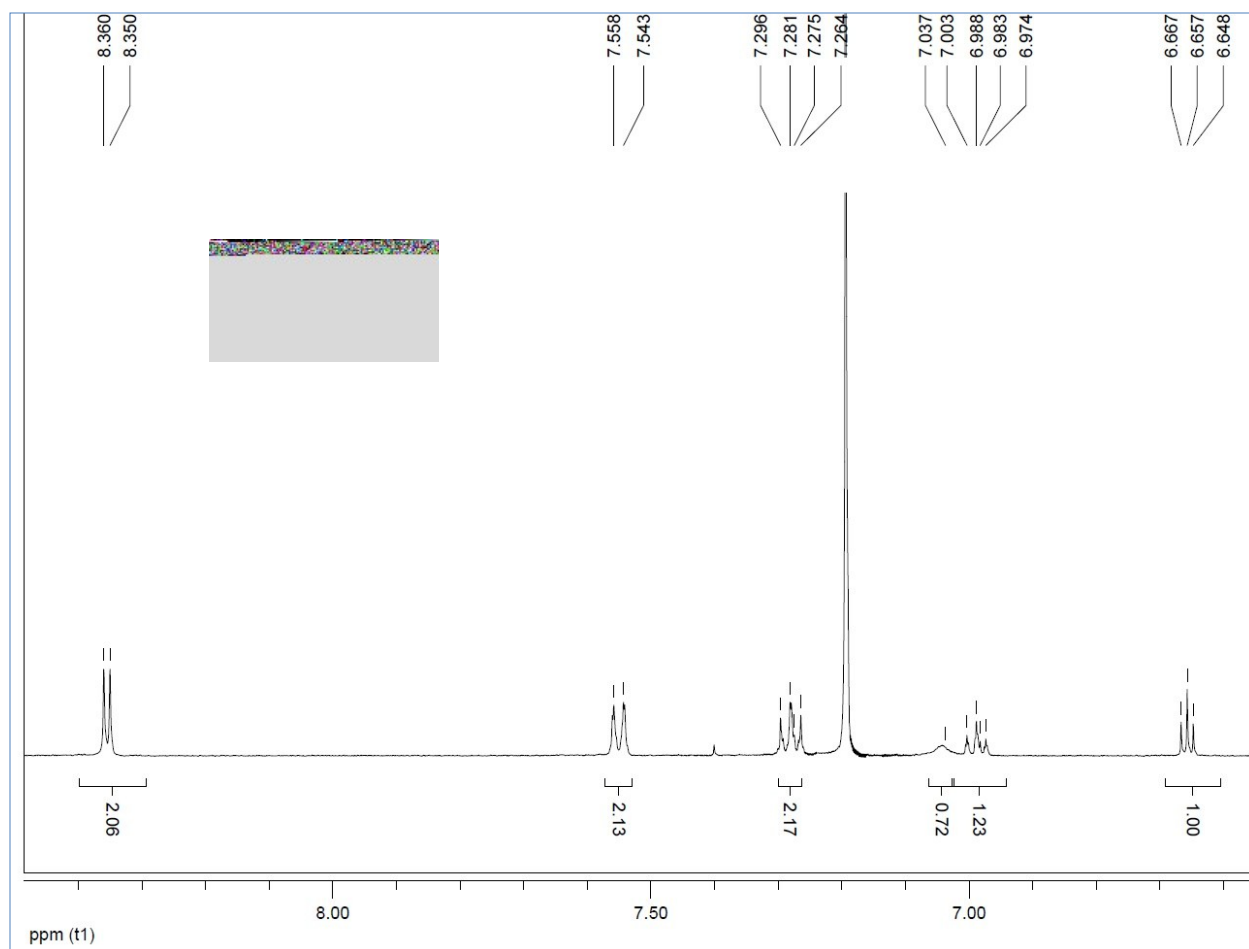

**Fig S8.** Expanded  $^1\text{H}$ -NMR spectrum of N-phenylpyrimidin-2-amine

***N*-Phenylnaphthalen-1-Amine (3g):**

Reddish-violet solid, mp 58 - 60 °C; yield: 84 %; <sup>1</sup>H NMR (500 MHz, CDCl<sub>3</sub>) δ = 7.97 (d, J = 8 Hz, 1H, CH of Ar), 7.82 (d, J = 8 Hz, 1H, CH of Ar), 7.52 (d, J = 7.5 Hz, 1H, CH of Ar), 7.40-7.47 (m, 2H, CH of Ar), 7.31-7.36 (m, 2H, CH of Ar), 7.19-7.23 (m, 2H, CH of Ar), 6.94 (d, J = 8 Hz, 2H, CH of Ar), 6.87 (t, J = 7 Hz, 1H, CH of Ar), 5.88 (s, 1H, NH).

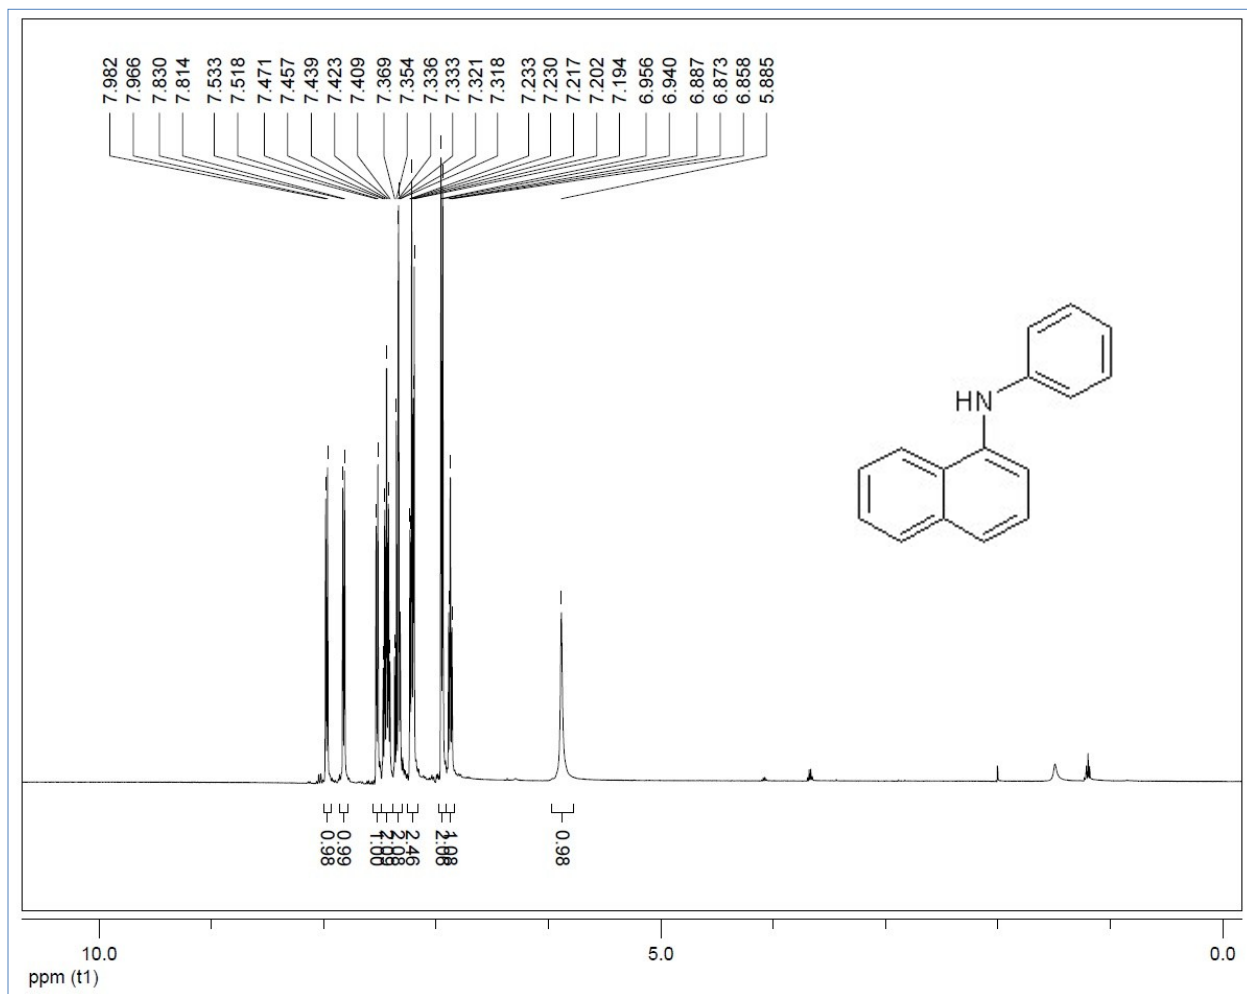

**Fig S9.** <sup>1</sup>H-NMR of *N*-phenylnaphthalen-1-amine

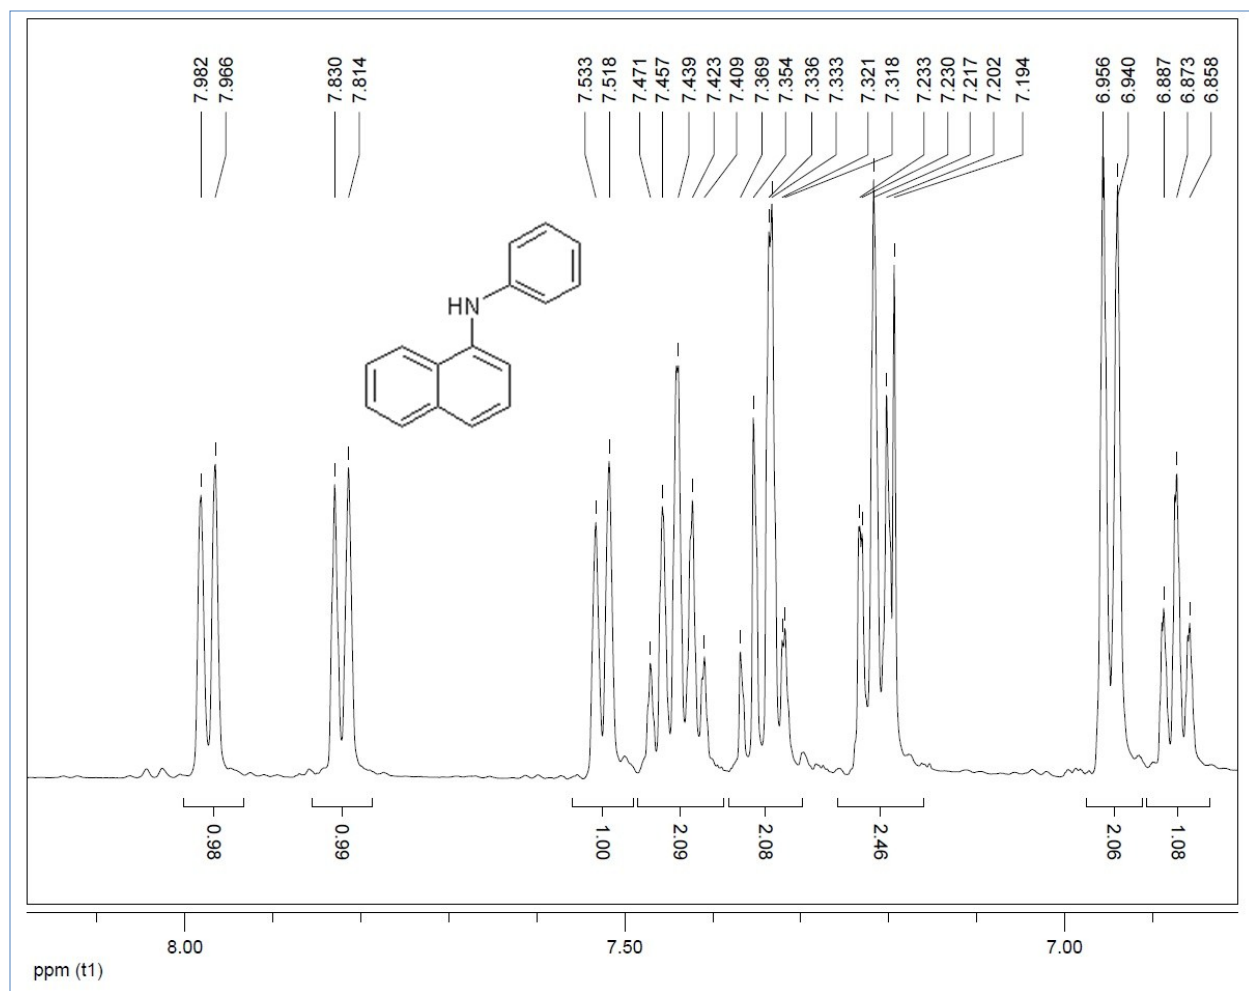

**Fig S10.** Expanded <sup>1</sup>H-NMR spectrum of *N*-phenylnaphthalen-1-amine
